# Supplementary material for: Long Non-Coding RNA GAPLINC Promotes Tumor-Like Biologic Behaviors of Fibroblast-Like Synoviocytes as MicroRNA Sponging in Rheumatoid Arthritis Patients
Source: PubMed Central journal article supplement (PMC5902673; doi:10.3389/fimmu.2018.00702), 2018-04-10
Supplement: Image_1.pdf [file Image_1.pdf]

## Supplementary material

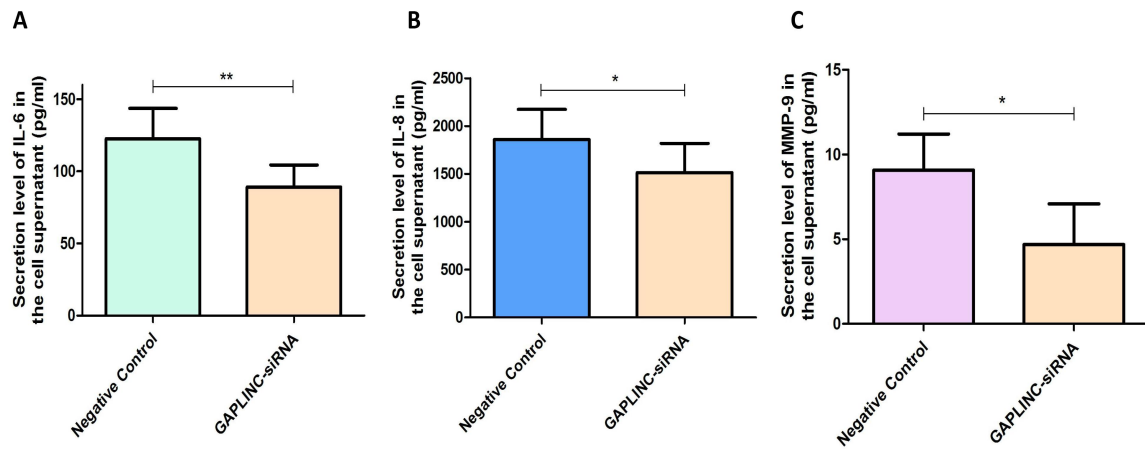

**Supplementary figure 1 GAPLINC suppression decreases IL-6, IL-8 and MMP-9 production of RA-FLSs.** The concentrations of proinflammatory cytokines (IL-6, IL-8 ) and matrix metalloproteinases-9 (MMP-9) (pg/mL) in the supernatant of RA-FLS cells were reduced after GAPLINC-siRNA treatment, compared to the NC-siRNA group ( $P<0.05$ ).
